# Supplementary material for: Nitrogen Fertilization Influences the Quantity, Composition, and Tissue Association of Foliar Phenolics in Strawberries
Source: Front Plant Sci. 2021 Apr 20;12:613839. doi: 10.3389/fpls.2021.613839 (PMC8093403; doi:10.3389/fpls.2021.613839)
Supplement: Supplementary file 2 [file Table_1.XLSX]

## Sheet: Sheet1
Sr. No.	Name	Formula	Actual RT	Theoretical m/z	Observed m/Z	mass error	MS2
	HYDROXYBENZOATES
1	GALLIC ACID	C7 H6 O5	3.42	169.014	169.013	4.73333	125.0238 (100)	Alvarez et al., 2015
2	PROTOCATECHUYL XYLULOSE	C12 H14 O8	6.26	285.061	285.061	1.05241	153.0188(100), 109.0289(10)	Alvarez et al., 2015
3	P-HYDROXYBENZOIC ACID GLUCOSIDE	C13 H16 O8	6.98	299.077	299.077	0.668725	137.0237(100), 93.0338(2)	Alvarez et al., 2015
4	PROTOCATECHUIC HEXOSIDE	C13 H16 O9	5.88	315.071	315.072	-1.58694	153.0187(100), 109.0281(8)	Alvarez et al., 2015
5	PROTOCATECHUIC HEXOSIDE	C13 H16 O9	3.94	315.071	315.072	-1.26955	153.0186(100), 275.8914(2), 165.0183(20), 109.0286(15)	Alvarez et al., 2015
	HYDROXYCINNAMATES
6	FURANEOL HEXOSIDE	C12H18O8		289.092	289.092	0.69182	MS2[289]: 245(6), 161(100), 101(8)	Sun et al., 2014
7	CAFFEOYL THREONATE		7.12	297.062	297.061	5.38607	135.0292(100), 179.0347(20)	Karlund et al., 2016
8	COUMAROYL HEXOSIDE	C15 H18 O8	7.84	325.092	325.092	-0.307605	163.0394(100), 119.0495(10)	Alvarez et al., 2015
9	COUMAROYL HEXOSIDE	C15 H18 O8	8.46	325.092	325.092	-0.307605	265.0713(100), 235	Alvarez et al., 2015
10	COUMAROYL HEXOSIDE	C15 H18 O8	8.91	325.092	325.093	-1.23042	265.0711(100), 235.0604(85), 205.0490(10), 163.0383(20)	Alvarez et al., 2015
11	COUMAROYL HEXOSIDE	C15 H18 O8	10.02	325.092	325.093	-1.53803	163.0393(100), 119.0497(35)113.0239(15)	Alvarez et al., 2015
12	CAFFEIC ACID HEXOSE	C15 H18 O9	7.57	341.087	341.087	1.66654e-10	311.0753(5), 281.0660(100), 251.0552(75), 221.0438(25), 179.0347(85), 135.0445(100)	Karlund et al., 2016
13	CAFFEIC ACID HEXOSE	C15 H18 O9	6.91	341.087	341.087	0.29318	323.0772(15), 311.0837(5), 281.0660(100), 251.0554(75), 221.0435(20), 179.0347(25)	Karlund et al., 2016
14	GALLOYLQUINIC ACID	C14 H16 O10	2.87	343.066	343.067	-2.04042	191.0556(100), 169.0132(10)	Karlund et al., 2016
15	GALLOYLQUINIC ACID	C14 H16 O10	2.82	343.066	343.067	-2.04042	169.0136(100), 191.0555(85)	Karlund et al., 2016
16	GALLOYLQUINIC ACID	C14 H16 O10	3.05	343.066	343.067	-2.04042	191.0555(100), 169.0136 (10)	Karlund et al., 2016
17	GALLOYLQUINIC ACID	C14 H16 O10	3.23	343.066	343.067	-0.874467	169.0136(100), 191.0554(10)	Karlund et al., 2016
18	FERULIC ACID HEXOSE	C16 H19O9	8.6	355.103	355.103	0.563217	217.0500(45), 193.0499(100), 175.0394(40)	Sun et al., 2014
19	FERULIC ACID HEXOSE	C16 H19O9	9.03	355.103	355.103	0	295.0818(75), 265.07119(100), 235.0606(80), 193.0486(15)	Sun et al., 2014
20	FERULIC ACID HEXOSE	C16 H19O9	9.32	355.103	355.103	0.281608	161.0237(100)	Sun et al., 2014
21	DIHYDROFERULIC ACID GLUCURONIDE	C16 H20 O10	9.76	371.098	371.098	-1.07788	249.0610(100)	Alvarez et al., 2015
22	DICOUMAROYLHEXOSIDE	C24H24O10	13.14	471.129	471.129	-0.424513	307.0820(100)	Urso et al., 2018
23	DICOUMAROYLHEXOSIDE	C24 H24 O10	12.44	471.129	471.129	-0.212256	307.0820(100), 163.0382(15)	Urso et al., 2018
	FLAVANONE
24	NARINGENIN FLAVANONE	C15 H12 O5	10.4	271.06	271.061	-2.58245	253.0500(20), 145.0291(30), 125.0239(100)	Massbank
25	ERIODICTYOL GLUCOSIDE	C21 H22 O11	9.24	449.108	449.108	2.58	287.0556(100), 265.0449(40)	Alvarez et al., 2015
	FLAVONE
26	APIGENIN PENTOSIDE	C20H18O9		401.087	401.086	-1.99	383(18), 357(8), 356(6), 355(6), 293(9), 269(100), 233(9), 161(20)	Sun et al., 2014
	FLAVONOLS
27	QUERCETIN COUMAROYL	C23H25O9	12.7	445.15	445.15	1.34786	145.0289(100), 163.0394(60), 265.0714(30)	Urso et al., 2018
28	QUERCITIN COUMAROYL	C23H25O9	12.7	445.15	445.15	1.34786	145.0289(100), 163.0394(60), 265.0714(30)	Urso et al., 2018
29	QUERCITIN COUMAROYL	C23H25O9	13.15	445.15	445.149	2.02179	145.0289(100), 163.0395(50), 265.0717(20)	Urso et al., 2018
30	KAEMPFEROL HEXOSIDE	C21H20O11	11.57	447.093	447.092	2.013	284.0321(100), 285.0394(95)	Alvarez et al., 2015
31	KAEMPFEROL GLUCURONIDE	C21 H18 O12	11.61	461.072	461.072	0.867543	285.0403(100)	Sun et al., 2014
32	KAEMPFEROL GLUCURONIDE	C21 H18 O12	11.61	461.072	461.072	0.867543	285.0403(100)	Sun et al., 2014
33	ISOQUERCETIN	C21H20O12	10.84	463.087	463.088	-1.72754	301.035	Sun et al., 2014
34	ISOQUERCETIN	C21H20O12	10.84	463.087	463.088	-1.72754	301.035	Sun et al., 2014
35	QUERCITIN GLUCURONIDE	C21 H18 O13	10.81	477.067	477.067	-0.419228	301.0353(100)	Sun et al., 2014
36	QUERCITIN GLUCURONIDE	C21 H18 O13	10.81	477.067	477.067	-0.419228	301.0353(100)	Sun et al., 2014
37	QUERCETIN DERIVATIVE		10.83	499.048	499.049	-1.80343	301.0348(100)
38	KAEMPFEROL PENTOSE GLUCURONIDE	C26H26O16	10.65	593.114	593.115	-0.843008	307.0667(15), 285.0402(100)	Hanhineva 2008
39	KAEMPFEROL PENTOSE GLUCURONIDE	C26H26O16	10.65	593.114	593.115	-0.843008	307.0667(15), 285.0402(100)	Hanhineva 2008
40	KAEMPFEROL PENTOSE GLUCURONIDE	C26H26O16	10.65	593.114	593.115	-0.843008	307.0667(15), 285.0402(100)	Hanhineva 2008
41	KAEMPFEROL COUMAROYL HEXOSIDE	C30H26O13	13.85	593.13	593.129	0.337194	447.0926(10), 285.0401(100)	Alvarez et al., 2015
42	KAEMPFEROL COUMAROYL HEXOSIDE	C30H26O13	13.85	593.13	593.129	0.337194	447.0926(10), 285.0401(100)	Alvarez et al., 2015
43	KAEMPFEROL COUMAROYL HEXOSIDE	C30H26O13	14.18	593.13	593.129	0.337194	447.0929(10), 285.0399(100)	Alvarez et al., 2015
44	KAEMPFEROL COUMAROYL HEXOSIDE	C30H26O13	13.85	593.13	593.129	0.337194	447.0926(10), 285.0401(100)	Alvarez et al., 2015
45	QUERCETIN PENTOSE GLUCURONIDE	C26H26O17	9.95	609.109	609.111	-2.79096	307.0667(10), 301.0354(100)	Alvarez et al., 2015
46	QUERCETIN PENTOSE GLUCURONIDE	C26H26O17	9.95	609.109	609.111	-2.79096	307.0667(10), 301.0354(100)	Alvarez et al., 2015
47	KAEMPFEROL HEXOSIDE GLUCURONIDE	C27H28O17	10.04	623.125	623.125	-0.320963	285.0400(100), 337.0770(20)	Urso et al., 2018
48	QUERCETIN DERIVATIVE		10.47	623.125	623.125	-0.641926	301.0350(100)
49	QUERCETIN HEXOSE GLUCURONIDE	C27H28O18	7.7	639.12	639.12	-0.156465	463.0877(100), 301.0341(15)	Karlund et al., 2016
50	QUERCETIN HEXOSE GLUCURONIDE	C27H28O18	9.43	639.12	639.12	-0.782326	337.0771(20), 301.0350(100)	Karlund et al., 2016
	FLAVAN-3-OLS
51	CATECHIN/EPICATECHIN	C15 H14 O6	7.89	289.071	289.072	-1.72968	271.0605(2), 245.0816(100), 205.0500(45), 203.0707(10), 179.0342(20)	Alvarez et al., 2015
52	DL-CATECHIN	C15 H14 O6	9.1	289.071	289.071	1.96642e-10	271.0605(2), 245.0816(100), 205.0500(40), 203.0707(10), 179.0342(20)	Alvarez et al., 2015
	PROANTHOCYANIDINS
53	PROANTHOCYANIDIN DIMER	C30 H26 O11	8.11	561.14	561.139	1.24746	289.0710(100), 543.1274(15), 435.1100(25), 407.0732(5), 271.0603(15)	Sun et al., 2014
54	PROANTHOCYANIDIN DIMER	C30 H26 O11	8.79	561.14	561.139	0.891044	289.0711(100), 543.1278(25), 435.1078(45), 407.0747(15), 271.0603(20)	Sun et al., 2014
55	PROANTHOCYANIDIN A1	C30H23O12	12.03	575.119	575.118	1.04326	557.1071(20), 449.0870(100), 437.0874(45), 394.0692(60), 287.0546(40)	Urso et al., 2018
56	PROCYANIDIN B2	C30H26O12	9.15	577.134	577.134	-0.34654	559.1266(5), 451.1028(25), 425.0874(100), 407.0770(25), 289.0710(20)	Sun et al., 2014
57	PROCYANIDIN B2	C30H26O12	7.4	577.134	577.134	1.96985e-10	559.1224(5), 451.1025(25), 425.0873(100), 407.0764(30), 289.0710(20)	Sun et al., 2014
58	PROCYANIDIN B2	C30H26O12	6.56	577.134	577.134	1.96985e-10	559.1243(10), 451.1036(25), 425.0872(100), 407.0762(30), 289.0714(30)	Sun et al., 2014
59	PROCYANIDIN B2	C30H26O12	7.4	577.134	577.134	1.96985e-10	559.1224(5), 451.1025(25), 425.0873(100), 407.0764(30), 289.0710(20)	Sun et al., 2014
60	PROCYANIDIN B2	C30H26O12	9.15	577.134	577.134	-0.34654	559.1266(5), 451.1028(25), 425.0874(100), 407.0770(25), 289.0710(20)	Sun et al., 2014
61	PROCYANIDIN B2	C30H26O12	7.4	577.134	577.134	1.96985e-10	559.1224(5), 451.1025(25), 425.0873(100), 407.0764(30), 289.0710(20)	Sun et al., 2014
62	PROCYANIDIN B2	C30H26O12	6.56	577.134	577.134	1.96985e-10	559.1243(10), 451.1036(25), 425.0872(100), 407.0762(30), 289.0714(30)	Sun et al., 2014
63	PROANTHOCYANIDIN TRIMER	C45H38O17	8.96	849.203	849.204	-1.41309	723.1760(80), 697.1563(35), 577.1323(100), 559.1219(65), 425.0878(20), 407.0758(25)	Sun et al., 2014
64	PROCYANIDIN TRIMER	C45H38O18	3.42	865.198	865.198	0.346741	739.1696(15), 713.1504(22), 695.1411(100), 575.1185(45), 543.0920(10), 449.0891(10), 413.0883(10), 287.0545(15)	Alvarez et al., 2015
65	PROCYANIDIN TRIMER	C45H38O18	7.61	865.198	865.198	-0.346741	847.1890(20), 739.1667(70), 713.1523(60), 695.1396(100), 577.1332(70), 451.1035(20), 425.0880(30), 407.0768(25), 287.0572(25)	Sun et al., 2014
66	PROCYANIDIN TRIMER	C45H38O18	7.83	865.198	865.198	0.346741	847.1843(20), 739.1652(65), 713.1509(55), 695.1400(100), 577.1341(65), 451.1022(15), 425.0885(20), 407.0768(20), 287.0550(25)	Sun et al., 2014
67	PROCYANIDIN TRIMER	C45H38O18	7.61	865.198	865.198	-0.346741	847.1890(20), 739.1667(70), 713.1523(60), 695.1396(100), 577.1332(70), 451.1035(20), 425.0880(30), 407.0768(25), 287.0572(25)	Sun et al., 2014
68	PROCYANIDIN TRIMER	C45H38O18	9.03	865.198	865.198	0.231161	847.1819(15), 739.1644(70), 713.1509(40), 695.1396(100), 577.1348(45),575.1191(80), 425.0876(20), 407.0763(25), 287.0572(20)	Sun et al., 2014
69	PROCYANIDIN TRIMER	C45H38O18	7.83	865.198	865.198	0.346741	847.1843(20), 739.1652(65), 713.1509(55), 695.1400(100), 577.1341(65), 451.1022(15), 425.0885(20), 407.0768(20), 287.0550(25)	Sun et al., 2014
70	PROCYANIDIN TRIMER	C45H38O18	3.42	865.198	865.198	0.346741	739.1696(15), 713.1504(22), 695.1411(100), 575.1185(45), 543.0920(10), 449.0891(10), 413.0883(10), 287.0545(15)	Alvarez et al., 2015
71	PROCYANIDIN TRIMER	C45H38O18	9.03	865.198	865.198	0.231161	847.1819(15), 739.1644(70), 713.1509(40), 695.1396(100), 577.1348(45),575.1191(80), 425.0876(20), 407.0763(25), 287.0572(20)	Sun et al., 2014
72	PROCYANIDIN TRIMER	C45H38O18	9.8	865.198	865.197	0.924644	847.1819(15), 739.1644(70), 713.1509(40), 695.1396(100), 577.1348(45),575.1191(80), 425.0876(20), 407.0763(25), 287.0572(20)	Sun et al., 2014
73	PROCYANIDIN TRIMER	C45H38O18	7.61	865.198	865.198	-0.346741	847.1890(20), 739.1667(70), 713.1523(60), 695.1396(100), 577.1332(70), 451.1035(20), 425.0880(30), 407.0768(25), 287.0572(25)	Sun et al., 2014
74	PROANTHOCYANIDIN TETRAMER	C60H50O24	8.51	1153.26	1153.26	-1.12724	1135.2449(28), 1027.2263(80), 1001.2143(35), 983.2014(100), 907.2036(25), 865.1940(90), 739.1677(25), 620.5901(15), 587.1147(15), 575.1213(50), 533.3897(15), 493.1348(15), 407.0758(20)	Sun et al., 2014
75	PROANTHOCYANIDIN TETRAMER	C60H50O24	8	1153.26	1153.26	-0.260132	1135.2722(28), 1027.2338(50), 1001.2187(25), 983.2103(55), 955.9057(25), 865.2084(100), 739.1755(25)	Sun et al., 2014
	ELLAGIC ACID DERIVATIVE
76	BREVIFOLIN CARBOXYLIC ACID	C13H8O8	8.19	291.015	291.014	3.77987	247.0243(100)	Alvarez et al., 2015
77	BREVIFOLIN CARBOXYLIC ACID	C13H8O8	8.78	291.015	291.014	3.43625	247.0243(100)	Alvarez et al., 2015
78	ELLAGIC ACID	C14H6O8	10.77	300.998	300.999	-3.32228	300.9988(100)
79	Ellagic acid	C14H6O8	10.94	300.998	300.999	-1.66114	300.9985(100)
80	Ellagic acid	C14H6O8	11.12	300.998	300.998	-0.332228	300.9982(100)
81	ELLAGIC ACID PENTOSIDE	C19H14O12	10.67	433.04	433.041	-1.61648	300.9984(100)	Sun et al., 2014
82	ELLAGIC ACID PENTOSIDE	C19H14O12	9.99	433.04	433.041	-1.61648	300.9984(100)	Sun et al., 2014
83	ELLAGIC ACID PENTOSIDE	C19H14O12	9.71	433.04	433.041	-1.61648	300.9984(100)	Sun et al., 2014
84	ELLAGIC ACID PENTOSIDE	C19H14O12	9.71	433.04	433.041	-1.61648	300.9984(100)	Sun et al., 2014
85	ELLAGIC ACID DEOXYHEXOSIDE	C20H16O12	10.05	447.055	447.056	-0.223686	300.9988 (100)	Sun et al., 2014
86	ELLAGIC ACID DEOXYHEXOSIDE	C20H16O12	10.22	447.055	447.057	-3.35529	299.09912(100), 300.9988 (80)	Sun et al., 2014
87	ELLAGIC ACID DEOXYHEXOSIDE	C20H16O12	10.05	447.055	447.056	-0.223686	300.9988 (100)	Sun et al., 2014
88	METHYLELLAGIC RHAMNOSIDE	C21H18O12	11.92	461.072	461.072	0	315.0143(100)	Sun et al., 2014
89	METHYLELLAGIC HEXOSE	C21H18O12	11.92	461.072	461.072	1.5182	315.0143(100)	Sun et al., 2014
	SIMPLE GALLOYLGLUCOSES
90	GLUCOGALLIN	C13 H16 O10	3.62	331.067	331.066	0.302054	169.0135(100)125.0228(2)	Alvarez et al., 2015
91	GLUCOGALLIN	C13 H16 O10	2.84	331.067	331.067	-1.81232	271.0456(8), 169.0136(100), 125.0239(10)	Alvarez et al., 2015
92	GLUCOGALLIN	C13 H16 O10	3.23	331.067	331.067	0	313.0559(98), 169.0132(30), 168.0057(100)	Alvarez et al., 2015
93	TRIGALLOYL GLUCOSE	C27H24O18	8.84	635.089	635.088	0.314917	465.0667(100)	Sun et al., 2014
94	TETRAGALLOYLGLUCOSE	C34H28O22	10.28	787.099	787.1	-0.381146	635.0881(15), 617.0784(100), 573.0881(2), 465.0655(5), 447.0566(2)	Barbera et al., 2017
	ELLAGITANNIN
95	UNKNOWN ELLAGITANNIN		9.43	466.028	466.029	-1.28748	751.0424(5), 631.0570(65), 613.0463(20), 450.9936(20), 300.9986(100), 275.0191(15)
96	HHDP HEXOSE	C20 H18 O14	2.8	481.062	481.062	0.831494	300.9989 (100)	Alvarez et al., 2015
97	HHDP HEXOSE	C20 H18 O14	2.8	481.062	481.062	0.831494	300.9989 (100)	Alvarez et al., 2015
98	CASTALIN LIKE ET	C27H20O18	7.77	631.057	631.058	-2.2185	450.9938(100), 407.0013(5)	Sun et al., 2014
99	CASTALIN LIKE ET	C27H20O18	8.81	631.057	631.057	-1.10925	450.9937(100), 407.0029(5)	Sun et al., 2014
100	CASTALIN LIKE ET	C27H20O18	9.39	631.057	631.058	-1.90157	450.9940(100), 407.0028(5)	Sun et al., 2014
101	GALLOYLHHDPGLUCOSE	C27 H22 O18	5.32	633.073	633.072	0.631839	300.9983(100), 637.0538(5), 481.0626(30), 463.0525(10), 275.0197(10)	Karlund et al., 2016
102	GALLOYLHHDPGLUCOSE	C27 H22 O18	6.37	633.073	633.072	0.631839	300.9984(100), 615.0671(5), 275.0187(5)	Karlund et al., 2016
103	GALLOYLHHDPGLUCOSE	C27 H22 O18	7.89	633.073	633.073	-1.10572	300.9987(100), 463.0511(5), 275.0194(5)	Karlund et al., 2016
104	PEDUNCULAGIN (BisHHDPglucose)	C34H24O22	6.42	783.068	783.068	0.510811	792.8326(1), 587.5961(2), 481.0623(30), 300.9985(100)	Aaby et al., 2007
105	PEDUNCULAGIN (BisHHDPglucose)	C34H24O22	4.48	783.068	783.068	-0.255406	765.0570(1), 481.0617(40), 300.9985(100), 275.0190(20), 257.0078(1)	Aaby et al., 2007
106	PEDUNCULAGIN DIMER	C34H24O22	9.72	783.068	783.067	1.40473	1265.1128(15), 935.0761(100), 915.0599(15), 631.0623(40), 300.9994(25)	Aaby et al., 2007
107	PEDUNCULAGIN (BisHHDPglucose)	C34H24O22	6.59	783.068	783.068	0.255406	481.0593(30), 300.9988(100), 275.0182(15)	Sun et al., 2014
108	PEDUNCULAGIN (BisHHDPglucose)	C34H24O22	4.48	783.068	783.068	-0.255406	765.0570(1), 481.0617(40), 300.9985(100), 275.0190(20), 257.0078(1)	Aaby et al., 2007
109	PEDUNCULAGIN (BisHHDPglucose)	C34H24O22	3.85	783.068	783.067	0.766217	765.064(20), 721.0789(25), 481.0610(60), 300.9997(100)	Aaby et al., 2007
110	PEDUNCULAGIN DIMER	C34H24O22	9.72	783.068	783.067	1.40473	1265.1128(15), 935.0761(100), 915.0599(15), 631.0623(40), 300.9994(25)	Aaby et al., 2007
111	PEDUNCULAGIN (BisHHDPglucose)	C34H24O22	4.48	783.068	783.068	-0.255406	765.0570(1), 481.0617(40), 300.9985(100), 275.0190(20), 257.0078(1)	Aaby et al., 2007
112	PEDUNCULAGIN (BisHHDPglucose)	C34H24O22	6.59	783.068	783.068	0.255406	481.0593(30), 300.9988(100), 275.0182(15)	Sun et al., 2014
113	PEDUNCULAGIN DIMER	C34H24O22	9.72	783.068	783.067	1.40473	1265.1128(15), 935.0761(100), 915.0599(15), 631.0623(40), 300.9994(25)	Aaby et al., 2007
114	TELLIMAGRANDIN (DigalloylHHDP glucose)	C34H26O22	8.57	785.084	785.084	0.127375	791.0367(8), 670.5311(8), 633.0738(25), 483.0771(70), 331.0649(10), 313.0556(10), 300.9983(100)	Aaby et al., 2007
115	CASTALGIN/VESCALGIN	C41 H26 O26	8.98	933.065	933.063	2.0363	915.0461(35), 631.0566(15), 481.0618(15), 4630610(5), 450.9940(100), 425.0173(10), 300.9976(5)	Del Bubba et al., 2012
116	CASTALGIN/VESCALGIN	C41 H26 O26	8.26	933.065	933.063	1.82195	631.0571(100), 469.0026(18), 300.9973(10)	Del Bubba et al., 2012
117	CASTALGIN/VESCALGIN	C41 H26 O26	8.98	933.065	933.063	2.0363	915.0461(35), 631.0566(15), 481.0618(15), 463.0610(5), 450.9940(100), 425.0173(10), 300.9976(5)	Del Bubba et al., 2012
118	CASTALGIN/VESCALGIN	C41 H26 O26	10.75	933.065	933.064	1.17891	915.0500(1), 631.0566(32), 481.0616(15), 450.9937(100)	Del Bubba et al., 2012
119	CASTALGIN/VESCALGIN	C41 H26 O26	11.38	933.065	933.064	1.50043	915.0614(1), 631.0546(32), 481.0592(15), 450.9937(100)	Del Bubba et al., 2012
120	CASTALGIN/VESCALGIN	C41 H26 O26	9.36	933.065	933.064	1.50043	915.0554(1), 631.0587(32), 481.0621(15), 450.9940(100)	Del Bubba et al., 2012
121	CASTALGIN/VESCALGIN	C41 H26 O26	8.26	933.065	933.063	1.82195	631.0571(100), 469.0026(18), 300.9973(10)	Del Bubba et al., 2012
122	CASTALGIN/VESCALGIN	C41 H26 O26	9.36	933.065	933.064	1.50043	915.0554(1), 631.0587(32), 481.0621(15), 450.9940(100)	Del Bubba et al., 2012
123	CASTALGIN/VESCALGIN	C41 H26 O26	8.98	933.065	933.063	2.0363	915.0461(35), 631.0566(15), 481.0618(15), 4630610(5), 450.9940(100), 425.0173(10), 300.9976(5)	Del Bubba et al., 2012
124	CASTALGIN/VESCALGIN	C41 H26 O26	9.54	933.065	933.064	1.07174	631.0569(100), 613.0476(20), 469.0049(20), 300.9977(2)	Del Bubba et al., 2012
125	CASTALGIN/VESCALGIN	C41 H26 O26	8.98	933.065	933.063	2.0363	915.0461(35), 631.0566(15), 481.0618(15), 463.0610(5), 450.9940(100), 425.0173(10), 300.9976(5)	Del Bubba et al., 2012
126	CASTALGIN/VESCALGIN	C41 H26 O26	10.75	933.065	933.064	1.17891	915.0500(5), 763.0507(10), 631.0566(35), 481.0618(15), 450.9937(100), 407.0028(2), 300.9978(5)	Del Bubba et al., 2012
127	CASTALGIN/VESCALGIN	C41 H26 O26	11.38	933.065	933.064	1.50043	915.0597(5), 763.0422(10), 631.0571(20), 481.0606(18), 450.9936(100), 407.0024(2), 300.9981(8)	Del Bubba et al., 2012
128	CASTALGIN/VESCALGIN	C41 H26 O26	9.74	933.065	933.064	0.643042	1567.1393(15), 1385.0618(20), 1235.0692(100), 915.0506(2), 783.0793(2), 633.0726(45), 613..0472(35), 300.9991(22)	Sun et al., 2014
129	CASUARICTIN/POTENTILLIN	C41 H28 O26	9.79	935.079	935.078	1.60414
130	CASUARICTIN/POTENTILLIN	C41 H28 O26	9.79	935.079	935.078	1.60414
131	CASUARICTIN/POTENTILLIN	C41 H28 O26	10.75	935.079	935.071	8.9832
132	CASUARICTIN/POTENTILLIN	C41 H28 O26	9.79	935.079	935.078	1.60414
133	CASUARICTIN/POTENTILLIN	C41 H28 O26	9.79	935.079	935.078	1.60414
134	GERANIIN	C41 H28 O27	8.55	951.075	951.074	0.210288	907.0834(100), 783.0687(15)	Sun et al., 2014
135	GERANIIN	C41 H28 O27	8.55	951.075	951.074	0.210288	907.0834(100), 783.0687(15)	Sun et al., 2014
136	GERANIIN	C41 H28 O27	7.11	951.075	951.074	1.05144	907.0840(100), 783.0680(15)	Sun et al., 2014
137	GERANIIN	C41 H28 O27	6.11	951.075	951.073	1.36687	907.0844(100), 783.0668(5)	Sun et al., 2014
138	GERANIIN	C41 H28 O27	6.92	951.075	951.074	1.05144	907.0829(100), 783.0674(25)	Sun et al., 2014
139	GERANIIN	C41 H28 O27	4.82	951.075	951.073	1.68231	907.0843(100), 783.0681(20)	Sun et al., 2014
140	GERANIIN	C41 H28 O27	6.91	951.075	951.074	0.946298	907.0840(100), 783.0654(25)	Sun et al., 2014
141	GERANIIN	C41 H28 O27	5.82	951.075	951.073	1.68231	907.0842(100), 695.2119(2)	Sun et al., 2014
142	GERANIIN	C41 H28 O27	8.55	951.075	951.074	0.210288	907.0834(100), 783.0687(15)	Sun et al., 2014
	OTHER PHENOLICS
143	Taxifolin arabinofuranoside		12.48	435.093	435.093	0.229836
144	CHELIDONIC ACID	C7 H4 O6	2.88	182.993	182.993	-1.09294	139.0031(30), 95.0134(100), 67.0186(10)	Urso et al., 2018
145	CITRIC ACID	C6 H8 O7	2.81	191.019	191.019	-1.4879e-10	111.0084(100)	Sun et al., 2014
146	SALIDROSIDE	C14 H20 O7	5.84	299.113	299.113	0.668643	243.7944(20), 205.0592(20), 173.5240(45), 113.0239(100), 101.0235(55), 89.0235(55)	Karlund et al., 2016
147	SALIDROSIDE	C14 H20 O7	5.84	299.113	299.113	0.668643	243.7944(20), 205.0592(20), 173.5240(45), 113.0239(100), 101.0235(55), 89.0235(55)	Karlund et al., 2016
148	SESQUITERPENOID HEXOSE	C21H38O8	12.88	417.249	417.248	0.95866	161.0436(100),255.1973(50)	Hanhineva 2008
